# Supplementary material for: Bacteria-released algal growth and morphogenesis factors regenerate axenic calli derived from the macroalga Ulva (Chlorophyta) and change the fatty acid profile
Source: publisher site journal article supplement (doi:10.1515/bot-2024-0101), 2025-04-28
Supplement: Supplementary file 1 [file j_bot-2024-0101_suppl_001.pdf]

**Supplementary Material for**  
**Bacteria-released algal growth and morphogenesis factors regenerate axenic calli**  
**derived from the macroalga *Ulva* (Chlorophyta) and change the fatty acid profile**

Hermann Holbl, Nico Dunger, Thomas Wichard\*

Friedrich Schiller University Jena, Institute for Inorganic and Analytical Chemistry,  
Lessingstr. 8, 07743 Jena

\*Corresponding author: thomas.wichard@uni-jena.de

**Content**

|                                                                                                                                                                   |    |
|-------------------------------------------------------------------------------------------------------------------------------------------------------------------|----|
| Table S1: Top 20 ranked dysregulated features ( <i>m/z</i> ) obtained by UHPLC-MS metabolomics                                                                    | 2  |
| Table S2: Mean relative abundance of fatty acids in <i>Ulva</i> .....                                                                                             | 3  |
| Table S3: Fatty acid quantification (derived from Figure 3D, E) in <i>Ulva</i> .....                                                                              | 4  |
| Figure S1: Comparison of representative GC-MS chromatograms of the total ion current (TIC) for fatty acid analysis in axenic calli of <i>Ulva mutabilis</i> ..... | 5  |
| Materials and Methods .....                                                                                                                                       | 6  |
| Cultivation of <i>Ulva</i> .....                                                                                                                                  | 6  |
| Maintenance of the <i>Ulva</i> callus. ....                                                                                                                       | 6  |
| Extraction procedure. ....                                                                                                                                        | 7  |
| Metabolomics. ....                                                                                                                                                | 7  |
| Derivatisation of fatty acids. ....                                                                                                                               | 8  |
| Targeted fatty acid analysis. ....                                                                                                                                | 9  |
| Fatty acids quantification. ....                                                                                                                                  | 10 |
| References .....                                                                                                                                                  | 11 |

**Table S1:** Top 20 ranked dysregulated features ( $m/z$ ) obtained by UHPLC-MS metabolomics, including hexadecanoic acid (red)

| #  | Molecular formula                                                             | Measured $m/z$ ( $[M\pm X]$ , Da) | Calculated mass (M, Da) | Theoretical monoisotopic mass (M, Da) | Adduct                | RT (min) | $\Delta$ (ppm) | $\log_2$ (Fold change) | raw p-value |
|----|-------------------------------------------------------------------------------|-----------------------------------|-------------------------|---------------------------------------|-----------------------|----------|----------------|------------------------|-------------|
| 1  | C <sub>9</sub> H <sub>10</sub> N <sub>2</sub>                                 | 147.09151                         | 146.08423               | 146.08439                             | [M+H] <sup>+</sup>    | 2.91     | -1.2           | 7.81                   | 0.00025     |
| 2  | C <sub>22</sub> H <sub>47</sub> N <sub>10</sub> O <sub>13</sub> P             | 689.30002                         | 690.30730               | 690.30616                             | [M-H] <sup>-</sup>    | 5.92     | 1.6            | 3.37                   | 0.00115     |
| 3  | C <sub>16</sub> H <sub>28</sub> O <sub>2</sub>                                | 251.20126                         | 252.20854               | 252.20893                             | [M-H] <sup>-</sup>    | 8.00     | -1.8           | 2.15                   | 0.00178     |
| 4  | C <sub>17</sub> H <sub>23</sub> F <sub>3</sub> N <sub>2</sub> S               | 345.15591                         | 344.14863               | 344.15340                             | [M+H] <sup>+</sup>    | 5.72     | 13.9           | 1.31                   | 0.00283     |
| 5  | C <sub>31</sub> H <sub>73</sub> N <sub>9</sub> O <sub>12</sub> P <sub>2</sub> | 826.49273                         | 825.48545               | 825.48539                             | [M+H] <sup>+</sup>    | 6.89     | 0.1            | -3.08                  | 0.00295     |
| 6  | C <sub>28</sub> H <sub>49</sub> NO <sub>15</sub>                              | 638.30209                         | 639.30937               | 639.31021                             | [M-H] <sup>-</sup>    | 5.92     | -1.3           | 3.29                   | 0.00299     |
| 7  | C <sub>18</sub> H <sub>30</sub> N <sub>6</sub> O <sub>4</sub>                 | 395.24224                         | 394.23496               | 394.23285                             | [M+H] <sup>+</sup>    | 5.58     | 5.4            | 2.32                   | 0.00314     |
| 8  | C <sub>6</sub> H <sub>8</sub> BrN <sub>7</sub> O                              | 271.99091                         | 272.99819               | 272.99737                             | [M-H] <sup>-</sup>    | 6.75     | 3.0            | -3.14                  | 0.00317     |
| 9  | C <sub>11</sub> H <sub>16</sub> O <sub>2</sub>                                | 181.12214                         | 180.11486               | 180.11503                             | [M+H] <sup>+</sup>    | 6.49     | -0.9           | 2.49                   | 0.00324     |
| 10 | C <sub>45</sub> H <sub>57</sub> N <sub>8</sub> OP                             | 757.45019                         | 756.44291               | 756.43929                             | [M+H] <sup>+</sup>    | 7.24     | 4.8            | -3.69                  | 0.00440     |
| 11 | C <sub>26</sub> H <sub>54</sub> N <sub>10</sub> O <sub>10</sub> S             | 697.36505                         | 698.37233               | 698.37450                             | [M-H] <sup>-</sup>    | 6.45     | -3.1           | 1.42                   | 0.00461     |
| 12 | C <sub>13</sub> H <sub>24</sub> O <sub>4</sub>                                | 243.15978                         | 244.16706               | 244.16745                             | [M-H] <sup>-</sup>    | 4.71     | -1.1           | -1.88                  | 0.00473     |
| 13 | C <sub>35</sub> H <sub>57</sub> N <sub>7</sub> O <sub>7</sub> P <sub>2</sub>  | 664.35303                         | 665.36031               | 665.36102                             | [M-H] <sup>-</sup>    | 6.96     | -1.1           | 2.79                   | 0.00492     |
| 14 | C <sub>25</sub> H <sub>40</sub> S <sub>2</sub>                                | 405.26305                         | 404.25577               | 404.25714                             | [M+H] <sup>+</sup>    | 6.15     | -3.4           | 1.79                   | 0.00531     |
| 15 | C <sub>32</sub> H <sub>55</sub> N <sub>8</sub> O <sub>8</sub> P <sub>2</sub>  | 642.33329                         | 643.34057               | 643.34029                             | [M-H] <sup>-</sup>    | 6.95     | 0.4            | 2.55                   | 0.00602     |
| 16 | C <sub>31</sub> H <sub>53</sub> N <sub>2</sub> O <sub>2</sub> P <sub>3</sub>  | 623.32769                         | 578.32949               | 578.33198                             | [M+FA-H] <sup>-</sup> | 6.32     | -4.5           | 3.17                   | 0.00725     |
| 17 | C <sub>28</sub> H <sub>51</sub> NO <sub>12</sub>                              | 594.34763                         | 593.34035               | 593.34112                             | [M+H] <sup>+</sup>    | 5.92     | -1.3           | 3.26                   | 0.00958     |
| 18 | C <sub>35</sub> H <sub>53</sub> N <sub>2</sub> O <sub>4</sub> P <sub>3</sub>  | 657.31188                         | 658.31916               | 658.32181                             | [M-H] <sup>-</sup>    | 5.17     | -4.0           | -2.54                  | 0.01008     |
| 19 | C <sub>28</sub> H <sub>31</sub> CIN <sub>8</sub> O <sub>7</sub>               | 314.10806                         | 626.20156               | 626.20042                             | [M+2H] <sup>2+</sup>  | 5.42     | 1.9            | 2.41                   | 0.01064     |
| 20 | C <sub>43</sub> H <sub>45</sub> N <sub>3</sub> O                              | 620.36266                         | 619.35538               | 619.35626                             | [M+H] <sup>+</sup>    | 6.15     | -1.4           | 2.68                   | 0.01201     |
| 90 | C <sub>16</sub> H <sub>32</sub> O <sub>2</sub>                                | 257.24682                         | 256.23954               | 256.24023                             | [M+H] <sup>+</sup>    | 6.64     | -1.9           | 1.25                   | 0.07004     |

**Table S2:** Mean relative abundance of fatty acids in *Ulva*, expressed as a percentage of their total quantified amount (mean  $\pm$  SD %,  $n = 3$ ). Fatty acid composition was determined in axenic callus cultures with and without the application of algal growth and morphogenesis-promoting factors (AGMPFs) and in adult stationary cultures with their associated microbiome. (n.d. = not detected).

| <b>Fatty acids (%)</b> | <b>Axenic callus</b> | <b>Axenic callus + AGMPFs</b> | <b>Adult stat. culture + microbiome</b> |
|------------------------|----------------------|-------------------------------|-----------------------------------------|
| <b>C14:0</b>           | 0.160 $\pm$ 0.081    | 0.209 $\pm$ 0.012             | 0.419 $\pm$ 0.171                       |
| <b>C15:0</b>           | n.d.                 | 0.050 $\pm$ 0.005             | 0.247 $\pm$ 0.078                       |
| <b>C16:0</b>           | 29.897 $\pm$ 2.233   | 23.619 $\pm$ 2.67             | 28.380 $\pm$ 9.897                      |
| <b>C16:1</b>           | n.d.                 | 1.838 $\pm$ 0.129             | 0.729 $\pm$ 0.257                       |
| <b>C16:2(n-6)</b>      | 1.378 $\pm$ 0.441    | 3.351 $\pm$ 0.138             | 2.026 $\pm$ 0.868                       |
| <b>C16:3(n-3)</b>      | 1.493 $\pm$ 0.415    | 1.843 $\pm$ 0.179             | 0.963 $\pm$ 0.293                       |
| <b>C16:4(n-3)</b>      | 16.707 $\pm$ 1.792   | 13.114 $\pm$ 1.135            | 11.941 $\pm$ 3.604                      |
| <b>C18:0</b>           | 0.374 $\pm$ 0.194    | 0.239 $\pm$ 0.015             | 0.509 $\pm$ 0.272                       |
| <b>C18:1</b>           | 16.706 $\pm$ 2.249   | 13.932 $\pm$ 1.264            | 10.162 $\pm$ 1.082                      |
| <b>C18:2(n-6)</b>      | 10.485 $\pm$ 0.538   | 20.790 $\pm$ 0.984            | 15.203 $\pm$ 3.397                      |
| <b>C18:3(n-6)</b>      | 0.629 $\pm$ 0.121    | 0.948 $\pm$ 0.023             | 0.537 $\pm$ 0.071                       |
| <b>C18:3(n-3)</b>      | 13.379 $\pm$ 3.988   | 10.673 $\pm$ 7.251            | 14.626 $\pm$ 6.952                      |
| <b>C18:4(n-3)</b>      | 7.759 $\pm$ 0.216    | 8.249 $\pm$ 0.934             | 11.717 $\pm$ 3.113                      |
| <b>C20:3(n-3)</b>      | 0.035 $\pm$ 0.009    | 0.094 $\pm$ 0.009             | 0.204 $\pm$ 0.08                        |
| <b>C20:4(n-6)</b>      | 0.348 $\pm$ 0.04     | 0.610 $\pm$ 0.073             | 0.975 $\pm$ 0.304                       |
| <b>C20:5(n-3)</b>      | 0.038 $\pm$ 0.008    | 0.032 $\pm$ 0.029             | 0.619 $\pm$ 0.568                       |
| <b>C22:0</b>           | 0.266 $\pm$ 0.017    | 0.368 $\pm$ 0.035             | 0.468 $\pm$ 0.184                       |
| <b>C22:1(n-9)</b>      | 0.345 $\pm$ 0.541    | 0.042 $\pm$ 0.028             | 0.275 $\pm$ 0.352                       |

**Table S3:** Fatty acid quantification (derived from Figure 3D, E) in *Ulva*. Data is presented as average (mg/g dry weight of algae)  $\pm$  SD or as ratio  $\sigma$ -6/ $\sigma$ -3 and PUFA/SFA  $\pm$  SD.

| Fatty acids                                      | Axenic callus        |               | Axenic callus<br>+ AGMPFs |               | Adult stat. culture<br>+ microbiome |               |
|--------------------------------------------------|----------------------|---------------|---------------------------|---------------|-------------------------------------|---------------|
| <b>C14:0</b>                                     | 0.00646 <sup>a</sup> | $\pm$ 0.00218 | 0.02438 <sup>a</sup>      | $\pm$ 0.00402 | 0.027 <sup>a</sup>                  | $\pm$ 0.01397 |
| <b>C15:0</b>                                     | n.d.                 |               | 0.00571 <sup>a</sup>      | $\pm$ 0.00058 | 0.01491 <sup>a</sup>                | $\pm$ 0.00514 |
| <b>C16:0</b>                                     | 1.31617 <sup>a</sup> | $\pm$ 0.26428 | 2.76984 <sup>b</sup>      | $\pm$ 0.66392 | 1.65633 <sup>b</sup>                | $\pm$ 0.31063 |
| <b>C16:1</b>                                     | n.d.                 |               | 0.21611 <sup>a</sup>      | $\pm$ 0.05064 | 0.05344 <sup>a</sup>                | $\pm$ 0.04288 |
| <b>C16:2 (n-6)</b>                               | 0.05789 <sup>a</sup> | $\pm$ 0.00672 | 0.39272 <sup>b</sup>      | $\pm$ 0.08172 | 0.14969 <sup>a</sup>                | $\pm$ 0.11327 |
| <b>C16:3 (n-3)</b>                               | 0.0634 <sup>a</sup>  | $\pm$ 0.00723 | 0.2177 <sup>b</sup>       | $\pm$ 0.05772 | 0.06961 <sup>a</sup>                | $\pm$ 0.05266 |
| <b>C16:4 (n-3)</b>                               | 0.73092 <sup>a</sup> | $\pm$ 0.11999 | 1.54103 <sup>a</sup>      | $\pm$ 0.36437 | 0.86213 <sup>a</sup>                | $\pm$ 0.63602 |
| <b>C18:0</b>                                     | 0.01529 <sup>a</sup> | $\pm$ 0.00603 | 0.02774 <sup>a</sup>      | $\pm$ 0.00406 | 0.02962 <sup>a</sup>                | $\pm$ 0.01587 |
| <b>C18:1</b>                                     | 0.76466 <sup>a</sup> | $\pm$ 0.32436 | 1.63278 <sup>b</sup>      | $\pm$ 0.36724 | 0.6572 <sup>a</sup>                 | $\pm$ 0.29051 |
| <b>C18:2 (n-6)</b>                               | 0.46362 <sup>a</sup> | $\pm$ 0.10480 | 2.43615 <sup>b</sup>      | $\pm$ 0.50653 | 1.04674 <sup>a</sup>                | $\pm$ 0.61905 |
| <b>C18:3 (n-6)</b>                               | 0.0271 <sup>a</sup>  | $\pm$ 0.00223 | 0.11103 <sup>b</sup>      | $\pm$ 0.02246 | 0.03381 <sup>a</sup>                | $\pm$ 0.01277 |
| <b>C18:3 (n-3)</b>                               | 0.63055 <sup>a</sup> | $\pm$ 0.36848 | 1.20488 <sup>a</sup>      | $\pm$ 0.85326 | 1.1115 <sup>a</sup>                 | $\pm$ 0.99644 |
| <b>C18:4 (n-3)</b>                               | 0.34509 <sup>a</sup> | $\pm$ 0.08936 | 0.97218 <sup>b</sup>      | $\pm$ 0.25410 | 0.70692 <sup>ab</sup>               | $\pm$ 0.20540 |
| <b>C20:3 (n-3)</b>                               | 0.0015 <sup>a</sup>  | $\pm$ 0.00005 | 0.01103 <sup>ab</sup>     | $\pm$ 0.00268 | 0.01449 <sup>b</sup>                | $\pm$ 0.00961 |
| <b>C20:4 (n-6)</b>                               | 0.01584 <sup>a</sup> | $\pm$ 0.00610 | 0.07215 <sup>b</sup>      | $\pm$ 0.02009 | 0.05805 <sup>b</sup>                | $\pm$ 0.01522 |
| <b>C20:5 (n-3)</b>                               | 0.00173 <sup>a</sup> | $\pm$ 0.00065 | 0.00365 <sup>a</sup>      | $\pm$ 0.00374 | 0.03014 <sup>b</sup>                | $\pm$ 0.01260 |
| <b>C22:0</b>                                     | 0.01181 <sup>a</sup> | $\pm$ 0.00292 | 0.04318 <sup>b</sup>      | $\pm$ 0.00988 | 0.02724 <sup>c</sup>                | $\pm$ 0.00623 |
| <b>C22:1 (n-9)</b>                               | 0.01239 <sup>a</sup> | $\pm$ 0.01882 | 0.0048 <sup>a</sup>       | $\pm$ 0.00363 | 0.01771 <sup>a</sup>                | $\pm$ 0.02166 |
| <b>TFA</b>                                       | 4.46441 <sup>a</sup> | $\pm$ 1.25686 | 11.68705 <sup>b</sup>     | $\pm$ 2.16106 | 6.56655 <sup>a</sup>                | $\pm$ 3.2779  |
| <b>PUFA</b>                                      | 2.33764 <sup>a</sup> | $\pm$ 0.68446 | 6.96252 <sup>b</sup>      | $\pm$ 1.29417 | 4.08308 <sup>ab</sup>               | $\pm$ 2.62511 |
| <b>SFA</b>                                       | 1.34973 <sup>a</sup> | $\pm$ 0.26078 | 2.87084 <sup>b</sup>      | $\pm$ 0.68223 | 1.75511 <sup>a</sup>                | $\pm$ 0.33019 |
| <b><math>\omega</math>6</b>                      | 0.56446 <sup>a</sup> | $\pm$ 0.10778 | 3.01205 <sup>b</sup>      | $\pm$ 0.62974 | 1.2883 <sup>a</sup>                 | $\pm$ 0.75893 |
| <b><math>\omega</math>3</b>                      | 1.77318 <sup>a</sup> | $\pm$ 0.57674 | 3.95047 <sup>b</sup>      | $\pm$ 0.86119 | 2.79479 <sup>a</sup>                | $\pm$ 1.88974 |
| <b><math>\omega</math>6/<math>\omega</math>3</b> | 0.32696 <sup>a</sup> | $\pm$ 0.03989 | 0.77305 <sup>b</sup>      | $\pm$ 0.16814 | 0.47201 <sup>a</sup>                | $\pm$ 0.0969  |
| <b>PUFA/SFA</b>                                  | 1.71098 <sup>a</sup> | $\pm$ 0.16398 | 2.46962 <sup>a</sup>      | $\pm$ 0.42276 | 2.19339 <sup>a</sup>                | $\pm$ 1.06381 |

**Figure S1**

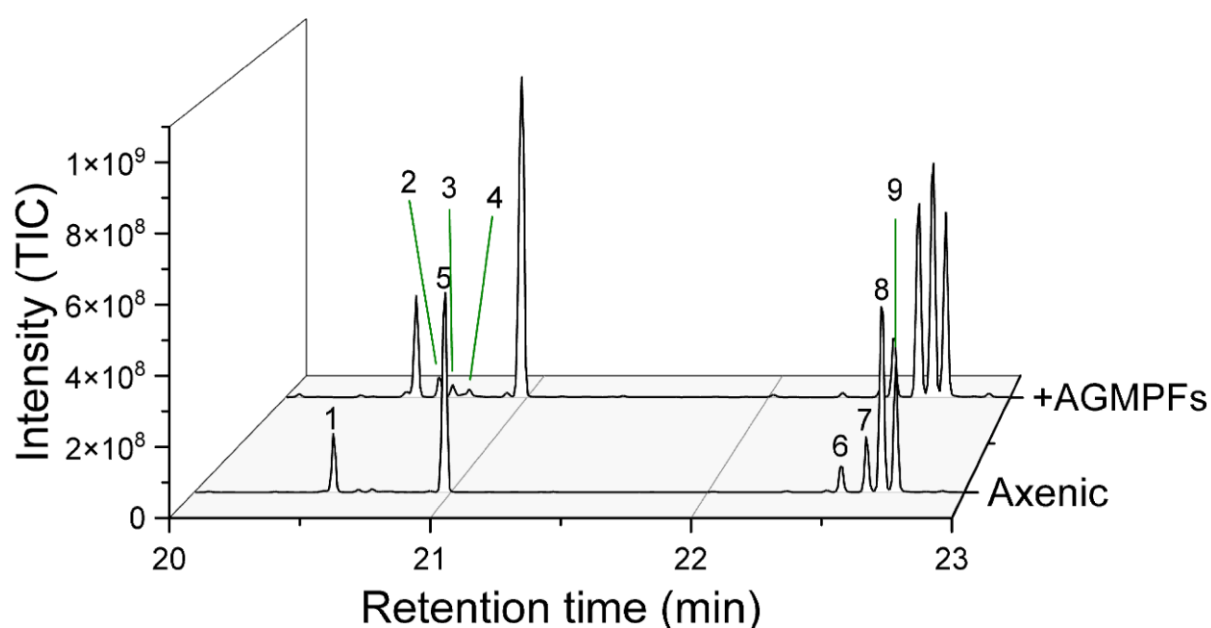

**Figure S1: Comparison of representative GC-MS chromatograms of the total ion current (TIC) for fatty acid analysis in axenic calli of *Ulva mutabilis*:** axenic control sample vs. AGMPF-treated sample after 14 days of inoculation. The assignment of major the fatty acid methyl esters (FAME) is as follows: **1:** C16:4 n-3, **2:** C16:2 n-6, **3:** C16:3 n-3, **4:** C16:1 n-7, **5:** C16:0, **6:** C18:4 n-3, **7:** C18:2 n-6, **8:** C18:3 n-3, **9:** C18:1. Traces of minor FAME C14:0 and C15:0 (18 – 20 min) and C20- and C22- fatty acids (24 – 27 min) are not shown. Separation of the FAME was performed on a Phenomenex Zebron ZB-SemiVolatiles column.

## Materials and Methods

**Cultivation of *Ulva*.** *Ulva mutabilis* (sl-G[mt +]; morphotype ‘slender’; *locus typicus*: Ria Formosa, Portugal, strain FSU-UM5-1) was grown in an *Ulva* culture medium (UCM) at 18°C  $\pm$  2 °C with a light/dark cycle of 17/7 h (Califano and Wichard, 2018; Stratmann et al., 1996). The light intensity was 40–80  $\mu\text{mol photons m}^{-2} \text{s}^{-1}$ . Algae from stationary stock cultures were utilised to generate gametes, and separation from bacteria was conducted using the phototactic movement of gametes according to an established protocol (Califano and Wichard 2018). Axenic gametes were cultivated for six weeks in a UCM in sterile tissue culture flasks equipped with filter caps (Sarstedt, Nümbrecht, Germany). The cultures were merged and allocated into six culture flasks under sterile conditions (**Fig. 1**, main text). Three culture flasks contained 40 ml of UCM, while the remaining three flasks contained a mixture of 10 ml UCM, 30 ml *Roseovarius* sp. supernatant (UCM with 1% glycerol added, obtained at an  $\text{OD}_{620} = 0.1$  and sterile filtered), and (–)-thallusin ( $2 \times 10^{-8} \text{ mol l}^{-1}$  in medium). Following a two-week cultivation period with consistent microscopy observation (Leica DM IL LED, Leica Microsystems, Aschaffenburg, Germany), the complete biomass of each culture was harvested after being rinsed in ultrapure water and subsequently frozen in liquid nitrogen. Samples were lyophilised overnight at -50 °C (Christ Alpha 1-2 LD Plus, Osterode, Germany), and the weight of each sample was subsequently measured. The biomass was pulverised using a Qiagen TissueLyser II (Venlo, Netherlands), and the samples were preserved at -70°C until the extraction of metabolites was performed. The cultivation and sample preparation of adult *Ulva* specimens in the stationary phase were conducted similarly.

**Maintenance of the *Ulva* callus.** *Ulva* calli were cultured in a plastic tissue culture flask under standard conditions in the UCM. Due to the slow growth, the medium was changed every two

months. The calli could be moved from one cell culture flask to another using a plastic scraper while growing on the plastic foundation.

**Extraction procedure.** Compounds were extracted using a commercially available kit (MAK338, Sigma-Aldrich, St. Louis, USA) according to the manufacturer's instructions for 40 mg biomass (dry weight). The algae samples were vortexed with 1.5 ml of extraction solution for one minute. Then, 0.25 ml of aqueous buffer was added and vortexed again for one minute. The resulting emulsion was mixed using the kit's syringe-filter combination and filtered into a new 2 ml reaction vessel. The aqueous phase was filtered off, yielding a clear, green solution. The exact volume was determined, and samples were aliquoted into 1.5 ml amber glass vials (WICOM, Heppenheim, Germany) and stored at -25°C. The samples were applied for metabolomics (UHPLC-MS) and fatty acid profiling (GC-MS).

**Metabolomics.** Aliquots of the samples were evaporated in vacuo and resolved in 30 µl of Methanol (MeOH). The quality control (QC) sample was prepared by mixing 5 µl of each sample. The platform used C<sub>18</sub> reversed-phase chromatography (Dionex UltiMate 3000 RS UHPLC system; Accucore® RP-C<sub>18</sub>, 100 × 2.1 mm; 2.6 µm) coupled with a Q-Exactive Plus Orbitrap mass spectrometer (Thermo Scientific, Bremen, Germany).

For chromatography, the column oven was maintained at 25°C and the samples at 10°C. Eluent A – a mixture of UHPLC grade water, 2% (v/v) UHPLC grade acetonitrile, and 0.1% (v/v) formic acid – was used. Eluent B consisted of pure UHPLC-grade acetonitrile. Three microliters of each sample were injected. Separation was performed using gradient elution with a flow rate of 0.4 ml/min: 0-0.2 min 0% B; 0.2-8.0 min 0-100% B; 8.0-11.0 min 100% B; 11.0-11.1 min 100-0% B; and 11.1-12.0 min 0% B.

Mass spectrometry utilised the positive/negative polarity switching mode for ionisation. The parameters were the following: Two full-scan modes were selected: Polarity: positive; scan

range: 100 to 1500  $m/z$ ; resolution: 70,000; AGC target:  $3 \times 10^6$ ; maximum IT: 200 ms. General settings: sheath gas flow rate: 60; auxiliary gas flow rate 20; sweep gas flow rate: 5; spray voltage: 4.0 kV; capillary temperature: 360 °C; S-lens RF level: 50; auxiliary gas heater temperature: 400 °C; acquisition time frame: 0.5 - 11.5 min.

For the negative mode, all values were kept beside the spray voltage, which was set to 2.5 kV. In the end, data-dependent analyses were recorded for the QC samples to generate MS/MS data. Additionally, the following MS parameters were applied: Scan range: auto, resolution: 17,500; AGC target:  $1 \times 10^5$ ; maximum IT: 50 ms, loop count = 5, preferred charge state = 1, dynamic exclusion: 20 sec, Isolation window:  $\pm 0.2 m/z$ , stepped collision energies: 15, 30, 45 NCE. Peak picking, alignment, deconvolution and metabolite identification were performed using the Compound Discoverer 3.3 (CD, Thermo Fisher Scientific). Features identified in the blank samples ( $\geq 20\%$  of the feature area) were excluded from the analysis. Pooled quality control samples (QC) were utilised to correct for time-dependent batch effects. The raw data was normalised based on the dry weight of the sample. Using default settings (Template: “Untargeted Metabolomics with statistics, detect unknowns with ID using online databases and mzlogic”) with minor adjustments (detect compounds: minimum intensity 50000, signal to noise ratio set to 3 in respective nodes, limitation of specific unlikely ion adducts), the raw data was compared within CD with Thermo Fisher data repositories like mzcloud, lab intern data repositories and open data repositories, such as ChemSpider and KEGG. The generated peak list was statistically analysed using Metaboanalyst 6.0 with the univariate and multivariate methods. The data was processed by log transformation and auto-scaling. The volcano plots illustrate the univariate analysis results for each metabolite feature with  $p < 0.1$  and a fold-change greater than two.

**Derivatisation of fatty acids.** The aliquoted samples were evaporated entirely using a nitrogen stream (Biotage-TurboVap® LV, Uppsala, Sweden) and subsequently methylated. The



methylation solution comprised 19 ml of methanol and 1 ml of acetyl chloride (Lepage and Roy 1984). For the derivatisation, 500 µl of methylation solution and 600 µl of *n*-hexane were added to the evaporated samples (Wichard et al. 2007). The samples were heated at 95°C for ten minutes and then cooled on ice. The samples were combined with 500 µl of ultrapure water and vortexed for one minute. The upper hexane phase was transferred to a new 1.5 ml short-thread bottle (ND9; LABSOLUTE®) preloaded with six spatula tips of anhydrous sodium sulfate. Subsequently, 200 µl of solution was aliquoted into new 1.5 ml vials and stored at -25°C.

**Targeted fatty acid analysis.** The approach used gas chromatography (Trace 1300 with AS3000 autosampler, Thermo Fisher, Bremen, Germany, equipped with Phenomenex Zebron ZB-SemiVolatiles column, 30 m, 0.25 mm I.D., 0.25 µm film thickness, Torrance, California, United States) coupled with mass spectrometry (ISQ single quadrupole, Thermo Fisher, Bremen, Germany). One microliter was injected in a splitless mode at 260°C. The oven temperature was initially set at 60°C for five minutes, raised at a rate of 10 °C/min to 300°C and sustained for an additional one minute. The temperature of the MS transfer line was set to 250°C. Helium was used as a carrier gas at a 1.2 ml per minute consistent flow rate. Electron impact ionisation occurred at 70 eV and a temperature of 280°C. Each measurement sequence started with two air blanks and concluded with assessing the external standards.

The Thermo Xcalibur 3.0.63 Qual Browser was used to examine the chromatograms. The external standard mix, Supelco 37 FAME (fatty acid methyl ester), was aliquoted and diluted 1:20 in dichloromethane (v:v). A second external standard of *cis*-4,7,10,13-Hexadecatetraenoic acid (C16:4 n-3) was prepared (0.0217 g l<sup>-1</sup> after derivatisation). The standards were measured at the end of every sequence. The external standards were employed to identify the chromatographic peaks corresponding to the fatty acid methyl esters. Characteristic masses for fatty acid methyl esters were utilised (Mjøs 2004). The characteristic mass-to-charge ratios (*m/z*) observed were *m/z* = 74 for the saturated fatty acid methyl esters, *m/z* = 55 for the

monounsaturated,  $m/z = 67$  for the di-unsaturated, and  $m/z = 79$  for the polyunsaturated fatty acid methyl esters, as determined from the extracted ion chromatograms (EIC).

The fatty acids were identified by comparing the retention time, molecular ion and fragmentation pattern with reference standard mixtures. The signals found in the algal analysis matched the external standards. C18:4(n-3), C16:2(n-6), and C16:3(n-3) were identified in the algal samples by the molecular ion and fragmentation pattern only.

**Fatty acids quantification.** After identification, the integrated peak area of the individual FAME was determined in the total ion or the extracted ion current mode (for characteristic fragments only, in case of peak overlapping) using the ICIS-Peak-Integrations-Algorithm (Baseline window: 5; area noise factor: 100; peak noise factor: 1; peak height: 5%; tailing factor: 9). The concentration of the analyte was calculated through the response factor. It is the ratio between the signal (area) produced by the analyte, and the quantity of analyte which produces the signal using the peak area of the external FAME standard. C18:4(n-3), C16:2(n-6) and C16:3(n-3), not present in the standards, were evaluated on the peak area of similar fatty acids provided by the FAME standard to estimate the concentration. For C18:4(n-3), the peak area of C16:4(n-3) was employed, while the peak area of C16:1(n-7) was used to estimate isomers of C16:1, C16:2(n-6) and C16:3(n-3). Data was normalised by the dry mass of the analysed algal tissue before statistical analyses were performed. Biological triplicates were employed to calculate the mean  $\pm$  standard deviation. Significant differences between means of treatments were determined by the one-way ANOVA with a Fisher Post-hoc-test ( $p < 0.05$ ).

## References

- Lepage, G., and Roy, C. C. (1984). Improved recovery of fatty acid through direct transesterification without prior extraction or purification. *J. Lipid Res.* 25:1391-6.
- Stratmann, J., Paputsoglu, G., and Oertel, W. (1996). Differentiation of *Ulva mutabilis* (Chlorophyta) gametangia and gamete release are controlled by extracellular inhibitors. *J. Phycol.* 32:1009-21.
- Mjøs, S. A. (2004). The prediction of fatty acid structure from selected ions in electron impact mass spectra of fatty acid methyl esters. *Eur. J. Lipid Sci. Technol.* 106:550-60.
- Wichard, T., Gerecht, A., Boersma, M., Poulet, S. A., Wiltshire, K., and Pohnert, G. (2007). Lipid and fatty acid composition of diatoms revisited: rapid wound-activated change of food quality parameters influences herbivorous copepod reproductive success. *ChemBioChem* 8:1146-53.
- Califano, G., and Wichard, T. (2018). Preparation of axenic cultures in *Ulva* (Chlorophyta). In: Reddy, C. [Ed.] *Protocols for macroalgae research*. CRC Press, Boca Raton, pp. 159-71.
